# Supplementary material for: Body‐worn cameras’ effects on police officers and citizen behavior: A systematic review
Source: PubMed Central journal article supplement (PMC8356344; doi:10.1002/cl2.1112), 2020-09-09
Supplement: CL2-16-e1112-s002.pdf [file CL2-16-e1112-s002.pdf]

## APPENDIX G: STUDY LEVEL RISK-OF-BIAS (SLIGHTLY MODIFIED COCHRANE TOOL)

Part of: Lum, C., Koper, C.S., Wilson, D.B., ... et al. (2020). Body-worn cameras' effects on police officers and citizen behavior: A systematic review. *Campbell Systematic Reviews* 2020;e1112.

<https://doi.org/10.1002/cl2.1112>.

| Study Name                                                | Domain 1: Risk of bias arising from the randomization process |     |         |         |                  | Domain 2: Risk of bias due to deviations from the intended interventions |     | Domain 5: Risk of bias in selection of the reported result |     |     |
|-----------------------------------------------------------|---------------------------------------------------------------|-----|---------|---------|------------------|--------------------------------------------------------------------------|-----|------------------------------------------------------------|-----|-----|
|                                                           | 1.1                                                           | 1.3 | 1 Extra | 1 Cont. | 1 Opt            | 2.6                                                                      | 2.7 | 5.1                                                        | 5.2 | 5.3 |
| Ariel (2016, 2017) DENVER, CO                             | N                                                             | Y   | N       | NI      | Unpredictable    | Y                                                                        | N   | NI                                                         | NI  | NI  |
| Ariel et al. (2016, 2017, 2018) SITE A                    | Y                                                             | N   | PY      | PY      | Unpredictable    | NI                                                                       | NI  | Y                                                          | NI  | NI  |
| Ariel et al. (2016, 2017, 2018) SITE B                    | Y                                                             | N   | PN      | PY      | Towards the null | NI                                                                       | NI  | Y                                                          | NI  | NI  |
| Ariel et al. (2016, 2017, 2018) SITE C                    | Y                                                             | N   | PY      | PY      | Unpredictable    | NI                                                                       | NI  | Y                                                          | NI  | NI  |
| Ariel et al. (2016, 2017, 2018) SITE D                    | Y                                                             | N   | N       | PY      | Towards the null | NI                                                                       | NI  | Y                                                          | NI  | NI  |
| Ariel et al. (2016, 2017, 2018) SITE E                    | Y                                                             | N   | PY      | PY      | Unpredictable    | NI                                                                       | NI  | Y                                                          | NI  | NI  |
| Ariel et al. (2016, 2017, 2018) SITE F                    | Y                                                             | N   | PY      | PY      | Unpredictable    | NI                                                                       | NI  | Y                                                          | NI  | NI  |
| Ariel et al. (2016, 2017, 2018) SITE H                    | Y                                                             | N   | PN      | PY      | Towards the null | NI                                                                       | NI  | Y                                                          | NI  | NI  |
| Ariel et al. (2016, 2017, 2018) SITE I                    | Y                                                             | N   | PY      | PY      | Towards the null | NI                                                                       | NI  | Y                                                          | NI  | NI  |
| Ariel et al. (2016, 2017, 2018) SITE J                    | Y                                                             | N   | PY      | PY      | Towards the null | NI                                                                       | NI  | Y                                                          | NI  | NI  |
| Ariel et al. (2016, 2017, 2018) SITE K                    | Y                                                             | N   | PY      | PY      | Towards the null | NI                                                                       | NI  | Y                                                          | NI  | NI  |
| Jennings et al. (2017) TAMPA, FL                          | N                                                             | N   | NI      | PY      | Towards the null | Y                                                                        | N   | NI                                                         | NI  | NI  |
| Ariel, Farrar, et al. (2012, 2013, 2015, 2017) RIALTO, CA | Y                                                             | N   | N       | Y       | Towards the null | Y                                                                        | N   | Y                                                          | N   | N   |
| Jennings et al. (2015) ORLANDO, FL                        | Y                                                             | N   | NI      | PY      | Towards the null | Y                                                                        | N   | NI                                                         | NI  | NI  |
| Mesa PD, Ready and Young (2013, 2015) MESA, AZ            | N                                                             | N   | NI      | PY      | Unpredictable    | Y                                                                        | N   | NI                                                         | NI  | NI  |
| Sousa, Braga, et al. (2016, 2018) LAS VEGAS, NV           | Y                                                             | N   | N       | Y       | Towards the null | Y                                                                        | N   | NI                                                         | NI  | NI  |
| Headley et al. (2017) HALLANDALE BEACH, FL                | N                                                             | NI  | N       | Y       | Unpredictable    | Y                                                                        | N   | NI                                                         | NI  | NI  |

| Study Name                                              | Domain 1: Risk of bias arising from the randomization process |     |         |         |                  | Domain 2: Risk of bias due to deviations from the intended interventions |     | Domain 5: Risk of bias in selection of the reported result |     |     |
|---------------------------------------------------------|---------------------------------------------------------------|-----|---------|---------|------------------|--------------------------------------------------------------------------|-----|------------------------------------------------------------|-----|-----|
|                                                         | 1.1                                                           | 1.3 | 1 Extra | 1 Cont. | 1 Opt            | 2.6                                                                      | 2.7 | 5.1                                                        | 5.2 | 5.3 |
| Henstock and Ariel (2017) WEST MIDLANDS, UK             | Y                                                             | N   | Y       | Y       | Towards the null | Y                                                                        | N   | Y                                                          | NI  | NI  |
| Mitchell et al. (2018) URUGUAY                          | N                                                             | Y   | PN      | N       | Unpredictable    | Y                                                                        | N   | NI                                                         | NI  | NI  |
| White et al. (2018) SPOKANE, WA                         | Y                                                             | N   | Y       | Y       | Towards the null | PN                                                                       | N   | NI                                                         | NI  | NI  |
| Wallace et al. (2018) SPOKANE, WA                       | Y                                                             | N   | Y       | Y       | Towards the null | PN                                                                       | PN  | NI                                                         | NI  | NI  |
| Braga et al. (2019) BOSTON, MA                          | Y                                                             | N   | NI      | Y       | Towards the null | Y                                                                        | N   | NI                                                         | NI  | NI  |
| Grossmith, Owens, Finn, et al. (2015, 2018) LONDON, UK  | Y                                                             | PN  | N       | PY      | Towards the null | Y                                                                        | N   | NI                                                         | NI  | NI  |
| Katz et al. (2015, 2016) PHOENIX, AZ (Maryvale)         | N                                                             | Y   | NI      | Y       | Towards the null | Y                                                                        | N   | NI                                                         | NI  | NI  |
| Peterson, Lawrence, et al. (2018, 2019) MILWAUKEE, WI   | Y                                                             | N   | NI      | PY      | Towards the null | Y                                                                        | N   | NI                                                         | NI  | NI  |
| Stolzenberg et al. (2019) MIAMI-DADE, FL                | N                                                             | N   | N       | N       |                  | Y                                                                        | N   | N                                                          | N   | N   |
| Koslicki et al. (2019) NORTHWEST CITY                   | N                                                             | N   | N       | N       |                  | Y                                                                        | N   | N                                                          | N   | N   |
| Yokum et al. (2019) WASHINGTON, DC                      | Y                                                             | N   | PN      | Y       | Towards the null | Y                                                                        | N   | Y                                                          | N   | N   |
| Bennett et al. (2019) FAIRFAX COUNTY, VA                | N                                                             | PN  | N       | N       | Unpredictable    | Y                                                                        | NI  | NI                                                         | NI  | NI  |
| Katz et al. (2019) PHOENIX, AZ (not Maryvale/Mandated)  | Y                                                             | N   | N       | PY      | Unpredictable    | Y                                                                        | N   | NI                                                         | N   | N   |
| Katz et al. (2019) PHOENIX, AZ (not Maryvale/Volunteer) | N                                                             | Y   | N       | PY      | Unpredictable    | Y                                                                        | N   | NI                                                         | N   | N   |

Notes:

Y=Yes; PY=Probably Yes; PN=Probably No; N=No; NI=No information

1.1: Was the allocation sequence random?

1.3: Did baseline differences between intervention groups suggest a problem with the randomization [or other selection] process?

| Study Name | Domain 1: Risk of bias arising from the randomization process |     |         |         |       | Domain 2: Risk of bias due to deviations from the intended interventions |     | Domain 5: Risk of bias in selection of the reported result |     |     |
|------------|---------------------------------------------------------------|-----|---------|---------|-------|--------------------------------------------------------------------------|-----|------------------------------------------------------------|-----|-----|
|            | 1.1                                                           | 1.3 | 1 Extra | 1 Cont. | 1 Opt | 2.6                                                                      | 2.7 | 5.1                                                        | 5.2 | 5.3 |

1 Extra: Were there violations to the randomization process?

1 Cont.: Was there contamination between the treatment and control conditions?

1 Opt.: What is the predicted direction of bias arising from the randomization [or other selection] process?

2.6: Was an appropriate analysis used to estimate the effect of assignment to intervention?

2.7: Was there potential for a substantial impact (on the result) of the failure to analyze participants in the group to which they were randomized?

5.1: Were the data that produced this result [the results for this study] analyzed in accordance with a pre-specified analysis plan that was finalized before unblinded outcome data were available for analysis?

5.2: Is (Are) the numerical result [results] being assessed likely to have been selected, on the basis of the results, from multiple outcome measurements?

5.3: Is (Are) the numerical result [results] being assessed likely to have been selected, on the basis of the results, from multiple analyses of the data?
