# Supplementary material for: Body‐worn cameras’ effects on police officers and citizen behavior: A systematic review
Source: PubMed Central journal article supplement (PMC8356344; doi:10.1002/cl2.1112), 2020-09-09
Supplement: CL2-16-e1112-s003.pdf [file CL2-16-e1112-s003.pdf]

**APPENDIX H. OUTCOME/DEPENDENT VARIABLE LEVEL RISK-OF-BIAS (SLIGHTLY MODIFIED COCHRANE TOOL)**

*Part of: Lum, C., Koper, C.S., Wilson, D.B., ... et al. (2020). Body-worn cameras' effects on police officers and citizen behavior: A systematic review. Campbell Systematic Reviews 2020;e1112. <https://doi.org/10.1002/cl2.1112>.*

| Construct and Study Name                                | Domain 3: Missing outcome data |                | Domain 4: Risk of bias in measurement |              |              |             |
|---------------------------------------------------------|--------------------------------|----------------|---------------------------------------|--------------|--------------|-------------|
|                                                         | 3.1                            | 3.2            | 4.2                                   | 4.3          | 4.4          | 4.5         |
| <b>Arrests</b>                                          |                                |                |                                       |              |              |             |
| Ariel (2016, 2017) DENVER, CO                           | Yes                            |                | No                                    | Yes          | No           |             |
| Braga et al. (2019) BOSTON, MA                          | Yes                            |                | No                                    | Probably Yes | Probably Yes | Probably No |
| Grossmith, Owens, Finn, et al. (2015, 2018) LONDON, UK  | Yes                            |                | No                                    | Probably No  |              |             |
| Headley et al. (2017) HALLANDALE BEACH, FL              | Probably Yes                   |                | No                                    | No           |              |             |
| Katz et al. (2015, 2016) PHOENIX, AZ (Maryvale)         | Probably Yes                   |                | No                                    | Yes          | Probably No  |             |
| Katz et al. (2019) PHOENIX, AZ (not Maryvale/Mandated)  | Yes                            |                | No                                    | No           |              |             |
| Katz et al. (2019) PHOENIX, AZ (not Maryvale/Volunteer) | Yes                            |                | No                                    | No           |              |             |
| Mesa PD, Ready and Young (2013, 2015) MESA, AZ          | No information                 | No information | Probably Yes                          |              |              |             |
| Peterson, Lawrence, et al. (2018, 2019) MILWAUKEE, WI   | Yes                            |                | No                                    | Yes          | Probably Yes | Probably No |
| Sousa, Braga, et al. (2016, 2018) LAS VEGAS, NV         | Yes                            |                | No                                    | Yes          | No           |             |
| Stolzenberg et al. (2019) MIAMI-DADE, FL                | Yes                            |                | No                                    | No           |              |             |
| Wallace et al. (2018) SPOKANE, WA                       | Yes                            |                | No                                    | No           |              |             |
| Yokum et al. (2019) WASHINGTON, DC                      | Yes                            |                | No                                    | Yes          | No           |             |
| <b>Citations</b>                                        |                                |                |                                       |              |              |             |
| Mesa PD, Ready and Young (2013, 2015) MESA, AZ          | No information                 | No information | Probably Yes                          |              |              |             |
| Sousa, Braga, et al. (2016, 2018) LAS VEGAS, NV         | Yes                            |                | No                                    | Yes          | No           |             |
| <b>Complaints Against Officer</b>                       |                                |                |                                       |              |              |             |
| Ariel (2016, 2017) DENVER, CO                           | Yes                            |                | Probably Yes                          |              |              |             |
| Ariel et al. (2016, 2017, 2018) SITE A                  | Probably Yes                   |                | Probably Yes                          |              |              |             |
| Ariel et al. (2016, 2017, 2018) SITE B                  | Probably Yes                   |                | Probably Yes                          |              |              |             |
| Ariel et al. (2016, 2017, 2018) SITE C                  | Probably Yes                   |                | Probably Yes                          |              |              |             |
| Ariel et al. (2016, 2017, 2018) SITE E                  | Probably Yes                   |                | Probably Yes                          |              |              |             |
| Ariel et al. (2016, 2017, 2018) SITE H                  | Probably Yes                   |                | Probably Yes                          |              |              |             |

| Construct and Study Name                                  | Domain 3: Missing outcome data |     | Domain 4: Risk of bias in measurement |     |     |     |
|-----------------------------------------------------------|--------------------------------|-----|---------------------------------------|-----|-----|-----|
|                                                           | 3.1                            | 3.2 | 4.2                                   | 4.3 | 4.4 | 4.5 |
| Ariel et al. (2016, 2017, 2018) SITE K                    | Probably Yes                   |     | Probably Yes                          |     |     |     |
| Ariel, Farrar, et al. (2012, 2013, 2015, 2017) RIALTO, CA | Probably Yes                   |     | Probably Yes                          |     |     |     |
| Bennett et al. (2019) FAIRFAX COUNTY, VA                  | Probably Yes                   |     | Probably Yes                          |     |     |     |
| Braga et al. (2019) BOSTON, MA                            | Yes                            |     | Probably Yes                          |     |     |     |
| Grossmith, Owens, Finn, et al. (2015, 2018) LONDON, UK    | Yes                            |     | Probably Yes                          |     |     |     |
| Headley et al. (2017) HALLANDALE BEACH, FL                | Probably Yes                   |     | Probably Yes                          |     |     |     |
| Jennings et al. (2015) ORLANDO, FL                        | Probably Yes                   |     | Probably Yes                          |     |     |     |
| Katz et al. (2015, 2016) PHOENIX, AZ (Maryvale)           | Probably Yes                   |     | Probably Yes                          |     |     |     |
| Katz et al. (2019) PHOENIX, AZ (not Maryvale/Mandated)    | Yes                            |     | Probably Yes                          |     |     |     |
| Katz et al. (2019) PHOENIX, AZ (not Maryvale/Volunteer)   | Yes                            |     | Probably Yes                          |     |     |     |
| Mitchell et al. (2018) URUGUAY                            | Yes                            |     | Probably Yes                          |     |     |     |
| Peterson, Lawrence, et al. (2018, 2019) MILWAUKEE, WI     | Yes                            |     | Probably Yes                          |     |     |     |
| Sousa, Braga, et al. (2016, 2018) LAS VEGAS, NV           | Yes                            |     | Probably Yes                          |     |     |     |
| Stolzenberg et al. (2019) MIAMI-DADE, FL                  | Yes                            |     | Probably Yes                          |     |     |     |
| White et al. (2018) SPOKANE, WA                           | Yes                            |     | Probably Yes                          |     |     |     |
| Yokum et al. (2019) WASHINGTON, DC                        | Yes                            |     | Probably Yes                          |     |     |     |
| <b>Dispatched Calls for Service</b>                       |                                |     |                                       |     |     |     |
| Ariel (2016, 2017) DENVER, CO                             | Yes                            |     | No                                    | Yes | No  |     |
| Bennett et al. (2019) FAIRFAX COUNTY, VA                  | Probably Yes                   |     | No                                    | No  |     |     |
| Braga et al. (2019) BOSTON, MA                            | Yes                            |     | No                                    | No  |     |     |
| Katz et al. (2019) PHOENIX, AZ (not Maryvale/Mandated)    | Yes                            |     | No                                    | No  |     |     |
| Katz et al. (2019) PHOENIX, AZ (not Maryvale/Volunteer)   | Yes                            |     | No                                    | No  |     |     |
| Sousa, Braga, et al. (2016, 2018) LAS VEGAS, NV           | Yes                            |     | No                                    | Yes | No  |     |
| <b>Incident Reports</b>                                   |                                |     |                                       |     |     |     |
| Braga et al. (2019) BOSTON, MA                            | Yes                            |     | No                                    | No  |     |     |
| Sousa, Braga, et al. (2016, 2018) LAS VEGAS, NV           | Yes                            |     | No                                    | Yes | No  |     |
| Stolzenberg et al. (2019) MIAMI-DADE, FL                  | Yes                            |     | No                                    | No  |     |     |
| <b>Officer Initiated CFS</b>                              |                                |     |                                       |     |     |     |
| Braga et al. (2019) BOSTON, MA                            | Yes                            |     | Probably Yes                          |     |     |     |

| Construct and Study Name                                | Domain 3: Missing outcome data |                | Domain 4: Risk of bias in measurement |     |     |     |
|---------------------------------------------------------|--------------------------------|----------------|---------------------------------------|-----|-----|-----|
|                                                         | 3.1                            | 3.2            | 4.2                                   | 4.3 | 4.4 | 4.5 |
| Headley et al. (2017) HALLANDALE BEACH, FL              | Probably Yes                   |                | Probably Yes                          |     |     |     |
| Katz et al. (2019) PHOENIX, AZ (not Maryvale/Mandated)  | Yes                            |                | Probably Yes                          |     |     |     |
| Katz et al. (2019) PHOENIX, AZ (not Maryvale/Volunteer) | Yes                            |                | Probably Yes                          |     |     |     |
| Mesa PD, Ready and Young (2013, 2015) MESA, AZ          | No information                 | No information | Probably Yes                          |     |     |     |
| Peterson, Lawrence, et al. (2018, 2019) MILWAUKEE, WI   | Yes                            |                | Probably Yes                          |     |     |     |
| Sousa, Braga, et al. (2016, 2018) LAS VEGAS, NV         | Yes                            |                | Probably Yes                          |     |     |     |
| Wallace et al. (2018) SPOKANE, WA                       | Yes                            |                | Probably Yes                          |     |     |     |
| <b>Assault on Officer/Officer Injuries/Resistance</b>   |                                |                |                                       |     |     |     |
| Ariel et al. (2016, 2017, 2018) SITE A                  | Probably Yes                   |                | Probably Yes                          |     |     |     |
| Ariel et al. (2016, 2017, 2018) SITE B                  | Probably Yes                   |                | Probably Yes                          |     |     |     |
| Ariel et al. (2016, 2017, 2018) SITE C                  | Probably Yes                   |                | Probably Yes                          |     |     |     |
| Ariel et al. (2016, 2017, 2018) SITE D                  | Probably Yes                   |                | Probably Yes                          |     |     |     |
| Ariel et al. (2016, 2017, 2018) SITE E                  | Probably Yes                   |                | Probably Yes                          |     |     |     |
| Ariel et al. (2016, 2017, 2018) SITE F                  | Probably Yes                   |                | Probably Yes                          |     |     |     |
| Ariel et al. (2016, 2017, 2018) SITE H                  | Probably Yes                   |                | Probably Yes                          |     |     |     |
| Ariel et al. (2016, 2017, 2018) SITE I                  | Probably Yes                   |                | Probably Yes                          |     |     |     |
| Ariel et al. (2016, 2017, 2018) SITE J                  | Probably Yes                   |                | Probably Yes                          |     |     |     |
| Ariel et al. (2016, 2017, 2018) SITE K                  | Probably Yes                   |                | Probably Yes                          |     |     |     |
| Headley et al. (2017) HALLANDALE BEACH, FL              | Probably Yes                   |                | Probably Yes                          |     |     |     |
| Katz et al. (2015, 2016) PHOENIX, AZ (Maryvale)         | Probably Yes                   |                | Probably Yes                          |     |     |     |
| Stolzenberg et al. (2019) MIAMI-DADE, FL                | Yes                            |                | Probably Yes                          |     |     |     |
| White et al. (2018) SPOKANE, WA                         | Probably Yes                   |                | Probably Yes                          |     |     |     |
| Yokum et al. (2019) WASHINGTON, DC                      | Probably Yes                   |                | Probably Yes                          |     |     |     |
| <b>Response Time</b>                                    |                                |                |                                       |     |     |     |
| Katz et al. (2019) PHOENIX, AZ (not Maryvale/Mandated)  | Yes                            |                | No                                    | No  |     |     |
| Katz et al. (2019) PHOENIX, AZ (not Maryvale/Volunteer) | Yes                            |                | No                                    | No  |     |     |
| Wallace et al. (2018) SPOKANE, WA                       | Yes                            |                | No                                    | No  |     |     |
| <b>Stop and Frisk</b>                                   |                                |                |                                       |     |     |     |
| Braga et al. (2019) BOSTON, MA                          | Yes                            |                | Probably Yes                          |     |     |     |

| Construct and Study Name                                  | Domain 3: Missing outcome data |                | Domain 4: Risk of bias in measurement |     |     |     |
|-----------------------------------------------------------|--------------------------------|----------------|---------------------------------------|-----|-----|-----|
|                                                           | 3.1                            | 3.2            | 4.2                                   | 4.3 | 4.4 | 4.5 |
| Grossmith, Owens, Finn, et al. (2015, 2018) LONDON, UK    | Yes                            |                | Probably Yes                          |     |     |     |
| Mesa PD, Ready and Young (2013, 2015) MESA, AZ            | No information                 | No information | Probably Yes                          |     |     |     |
| Peterson, Lawrence, et al. (2018, 2019) MILWAUKEE, WI     | Yes                            |                | Probably Yes                          |     |     |     |
| <b>Time on Scene</b>                                      |                                |                |                                       |     |     |     |
| Wallace et al. (2018) SPOKANE, WA                         | Yes                            |                | No                                    | No  |     |     |
| <b>Traffic Stops</b>                                      |                                |                |                                       |     |     |     |
| Bennett et al. (2019) FAIRFAX COUNTY, VA                  | Probably Yes                   |                | Probably Yes                          |     |     |     |
| Headley et al. (2017) HALLANDALE BEACH, FL                | Probably Yes                   |                | Probably Yes                          |     |     |     |
| Peterson, Lawrence, et al. (2018, 2019) MILWAUKEE, WI     | Yes                            |                | Probably Yes                          |     |     |     |
| Stolzenberg et al. (2019) MIAMI-DADE, FL                  | Yes                            |                | Probably Yes                          |     |     |     |
| Yokum et al. (2019) WASHINGTON, DC                        | Yes                            |                | Probably Yes                          |     |     |     |
| <b>Use of Force</b>                                       |                                |                |                                       |     |     |     |
| Ariel (2016, 2017) DENVER, CO                             | Yes                            |                | Probably Yes                          |     |     |     |
| Ariel et al. (2016, 2017, 2018) SITE A                    | Probably Yes                   |                | Probably Yes                          |     |     |     |
| Ariel et al. (2016, 2017, 2018) SITE B                    | Probably Yes                   |                | Probably Yes                          |     |     |     |
| Ariel et al. (2016, 2017, 2018) SITE C                    | Probably Yes                   |                | Probably Yes                          |     |     |     |
| Ariel et al. (2016, 2017, 2018) SITE D                    | Probably Yes                   |                | Probably Yes                          |     |     |     |
| Ariel et al. (2016, 2017, 2018) SITE E                    | Probably Yes                   |                | Probably Yes                          |     |     |     |
| Ariel et al. (2016, 2017, 2018) SITE F                    | Probably Yes                   |                | Probably Yes                          |     |     |     |
| Ariel et al. (2016, 2017, 2018) SITE H                    | Probably Yes                   |                | Probably Yes                          |     |     |     |
| Ariel et al. (2016, 2017, 2018) SITE I                    | Probably Yes                   |                | Probably Yes                          |     |     |     |
| Ariel et al. (2016, 2017, 2018) SITE J                    | Probably Yes                   |                | Probably Yes                          |     |     |     |
| Ariel et al. (2016, 2017, 2018) SITE K                    | Probably Yes                   |                | Probably Yes                          |     |     |     |
| Ariel, Farrar, et al. (2012, 2013, 2015, 2017) RIALTO, CA | Probably Yes                   |                | Probably Yes                          |     |     |     |
| Bennett et al. (2019) FAIRFAX COUNTY, VA                  | Probably Yes                   |                | Probably Yes                          |     |     |     |
| Braga et al. (2019) BOSTON, MA                            | Yes                            |                | Probably Yes                          |     |     |     |
| Headley et al. (2017) HALLANDALE BEACH, FL                | Probably Yes                   |                | Probably Yes                          |     |     |     |
| Henstock and Ariel (2017) WEST MIDLANDS, UK               | Yes                            |                | Probably Yes                          |     |     |     |
| Jennings et al. (2015) ORLANDO, FL                        | Probably Yes                   |                | Probably Yes                          |     |     |     |

| Construct and Study Name                                | Domain 3: Missing outcome data |              | Domain 4: Risk of bias in measurement |              |     |     |
|---------------------------------------------------------|--------------------------------|--------------|---------------------------------------|--------------|-----|-----|
|                                                         | 3.1                            | 3.2          | 4.2                                   | 4.3          | 4.4 | 4.5 |
| Jennings et al. (2017) TAMPA, FL                        |                                | Probably Yes |                                       | Probably Yes |     |     |
| Katz et al. (2019) PHOENIX, AZ (not Maryvale/Mandated)  | Yes                            |              |                                       | Probably Yes |     |     |
| Katz et al. (2019) PHOENIX, AZ (not Maryvale/Volunteer) | Yes                            |              |                                       | Probably Yes |     |     |
| Koslicki et al. (2019) NORTHWEST CITY                   | Yes                            |              |                                       | Probably Yes |     |     |
| Peterson, Lawrence, et al. (2018, 2019) MILWAUKEE, WI   | Yes                            |              |                                       | Probably Yes |     |     |
| Sousa, Braga, et al. (2016, 2018) LAS VEGAS, NV         | Yes                            |              |                                       | Probably Yes |     |     |
| Stolzenberg et al. (2019) MIAMI-DADE, FL                | Yes                            |              |                                       | Probably Yes |     |     |
| White et al. (2018) SPOKANE, WA                         | Yes                            |              |                                       | Probably Yes |     |     |
| Yokum et al. (2019) WASHINGTON, DC                      | Yes                            |              |                                       | Probably Yes |     |     |
| Yokum et al. (2019) WASHINGTON, DC                      | Yes                            |              |                                       | Probably Yes |     |     |

*Note:*

3.1: Were data for this outcome available for all, or nearly all, participants randomized?

3.2: If N/PN/NI to 3.1: Is there evidence that the result was not biased by missing outcome data?

4.2: Could measurement or ascertainment of the outcome have differed between intervention groups?

4.3: If N/PN/NI 4.2: Were outcome assessors aware of the intervention received by study participants?

4.4: If Y/PY/NI to 4.3: Could assessment of the outcome have been influenced by knowledge of intervention received?
