# Supplementary material for: Body‐worn cameras’ effects on police officers and citizen behavior: A systematic review
Source: PubMed Central journal article supplement (PMC8356344; doi:10.1002/cl2.1112), 2020-09-09
Supplement: CL2-16-e1112-s006.pdf [file CL2-16-e1112-s006.pdf]

## **APPENDIX C: LIST OF BWC SCHOLARS AND EXPERTS CONTACTED DURING THE SEARCH PROCESS**

*Part of: Lum, C., Koper, C.S., Wilson, D.B., ... et al. (2020). Body-worn cameras' effects on police officers and citizen behavior: A systematic review. Campbell Systematic Reviews 2020;e1112. <https://doi.org/10.1002/cl2.1112>.*

Ian Adams, University of Utah  
Barak Ariel, University of Cambridge  
Brad Bartholomew, American University  
Richard Bennett, American University  
Anthony Braga, Northeastern University  
David Choate, Arizona State University  
James Coldren, C.N.A. Corporation  
Alexander Coppock, Yale University  
Matthew Crow, University of West Florida  
Scott Culhane, University of Wyoming  
Stewart D'Alessio, Florida International University  
Tom Ellis, University of Portsmouth  
William Farrar, Mt. San Jacinto College  
Jamie Flexon, Florida International University  
Lorie Fridell, University of South Florida  
Janne Gaub, East Carolina University  
Martin Goodall, Keystone Law  
Sean Goodison, Police Executive Research Forum  
Joseph Gramaglia, Buffalo, NY Police Department  
Rob Guerette, Florida International University  
Paul Guerin, University of New Mexico  
Elliot Harkavy, C.N.A. Corporation  
Andrea Headley, Ohio State University  
Eric Hedberg, National Opinion Research Center  
Darren Henstock, Western Australia Police  
Jessica Huff, Arizona State University  
Jordan Hyatt, Drexel University  
Shelley Hyland, Bureau of Justice Statistics  
Wesley Jennings, University of Mississippi  
Robert Kaminski, University of South Carolina  
Charles Katz, Arizona State University  
Erin Kerrison, University of California, Berkeley  
Marthinus Koen, University of Southern Indiana  
Wendy Koslicki, Ball State University  
Michael Kyle, Southern Illinois University  
Nancy La Vigne, Urban Institute  
Daniel Lawrence, Urban Institute  
David Makin, Washington State University

John Markovic, USDOJ COPS Office  
Jon Maskaly, University of Texas, Dallas  
Sharon Mastracci, University of Utah  
Linda Merola, George Mason University  
David McClure, Police Executive Research Forum  
John McCluskey, Rochester Institute of Technology  
Jack McDevitt, Northeastern University  
Kyle McLean, Florida State University  
Renee Mitchell, RTI International  
Weston Morrow, University of Nevada, Reno  
Bryce Newell, University of Kentucky  
Peter Neyroud, University of Cambridge  
Jeffrey Nowacki, Colorado State University  
Jonah Obasi, Walden University  
Catherine Owens, College of Policing  
Megan Parry, University of Rhode Island  
Jon Peha, Carnegie Mellon University  
William Pelfrey, Virginia Commonwealth University  
Bryce Peterson, Urban Institute  
Joshua Phelps, Norwegian Police University College, Oslo  
Justin Ready, Griffith University  
Denise Rodriguez, C.N.A. Corporation  
Mike Rose, University of California, Los Angeles  
Mike Rowe, University of Liverpool  
Auzeen Shariati, St. Joseph's College  
John Smykla, Florida Atlantic University  
William Sousa, University of Nevada, Las Vegas  
Lisa Stolzenberg, Florida International University  
Alex Sutherland, The Behavioral Insights Team  
Justice Tankebe, Cambridge University  
Emmeline Taylor, City, University of London  
Natalie Todak, The University of Alabama at Birmingham  
Paige Thompson, Urban Institute  
Craig Uchida, Justice & Security Strategies, Inc.  
Danielle Wallace, Arizona State University  
Brandon Welsh, Northeastern University  
Michael White, Arizona State University  
James Willis, George Mason University  
Dale Willits, Washington State University  
Scott Wolfe, Michigan State University  
Rob Worden, John F. Finn Institute for Public Safety  
David Yokum, Brown University  
Jacob Young, Arizona State University  
Greg Zimmerman, Northeastern University
