# Supplementary material for: Body‐worn cameras’ effects on police officers and citizen behavior: A systematic review
Source: PubMed Central journal article supplement (PMC8356344; doi:10.1002/cl2.1112), 2020-09-09
Supplement: CL2-16-e1112-s008.pdf [file CL2-16-e1112-s008.pdf]

## APPENDIX I. OUTCOME CONSTRUCTS BY EACH STUDY FOR WHICH AN EFFECT SIZE WAS COMPUTED

Part of: Lum, C., Koper, C.S., Wilson, D.B., ... et al. (2020). Body-worn cameras' effects on police officers and citizen behavior: A systematic review. *Campbell Systematic Reviews* 2020;e1112. <https://doi.org/10.1002/cl2.1112>.

|                                                           | Arrests | Citations | Complaints Against Officer | Dispatched Calls for Service | Incident Reports | Officer Initiated CFS | Officer Injuries/Assault | Resistance | Response Time | Stop and Frisk | Time on Scene | Traffic Stops | Use of Force |
|-----------------------------------------------------------|---------|-----------|----------------------------|------------------------------|------------------|-----------------------|--------------------------|------------|---------------|----------------|---------------|---------------|--------------|
| Ariel (2016, 2017) DENVER, CO                             | x       |           | x                          | x                            |                  |                       |                          |            |               |                |               |               | x            |
| Ariel et al. (2016, 2017, 2018) SITE A                    |         |           | x                          |                              |                  |                       | x                        |            |               |                |               |               | x            |
| Ariel et al. (2016, 2017, 2018) SITE B                    |         |           | x                          |                              |                  |                       | x                        |            |               |                |               |               | x            |
| Ariel et al. (2016, 2017, 2018) SITE C                    |         |           | x                          |                              |                  |                       | x                        |            |               |                |               |               | x            |
| Ariel et al. (2016, 2017, 2018) SITE D                    |         |           |                            |                              |                  |                       | x                        |            |               |                |               |               | x            |
| Ariel et al. (2016, 2017, 2018) SITE E                    |         |           | x                          |                              |                  |                       | x                        |            |               |                |               |               | x            |
| Ariel et al. (2016, 2017, 2018) SITE F                    |         |           |                            |                              |                  |                       | x                        |            |               |                |               |               | x            |
| Ariel et al. (2016, 2017, 2018) SITE H                    |         |           | x                          |                              |                  |                       | x                        |            |               |                |               |               | x            |
| Ariel et al. (2016, 2017, 2018) SITE I                    |         |           |                            |                              |                  |                       | x                        |            |               |                |               |               | x            |
| Ariel et al. (2016, 2017, 2018) SITE J                    |         |           |                            |                              |                  |                       | x                        |            |               |                |               |               | x            |
| Ariel et al. (2016, 2017, 2018) SITE K                    |         |           | x                          |                              |                  |                       | x                        |            |               |                |               |               | x            |
| Ariel, Farrar, et al. (2012, 2013, 2015, 2017) RIALTO, CA |         |           | x                          |                              |                  |                       |                          |            |               |                |               |               | x            |
| Bennett et al. (2019) FAIRFAX COUNTY, VA                  |         |           | x                          | x                            |                  |                       |                          |            |               |                |               | x             | x            |
| Braga et al. (2019) BOSTON, MA                            | x       |           | x                          | x                            | x                | x                     |                          |            |               | x              |               |               | x            |
| Grossmith, Owens, Finn, et al. (2015, 2018) LONDON, UK    | x       |           | x                          |                              |                  |                       |                          |            |               | x              |               |               |              |
| Headley et al. (2017) HALLANDALE BEACH, FL                | x       |           | x                          |                              |                  | x                     | x                        | x          |               |                |               | x             | x            |
| Henstock and Ariel (2017) WEST MIDLANDS, UK               |         |           |                            |                              |                  |                       |                          |            |               |                |               |               | x            |
| Jennings et al. (2015) ORLANDO, FL                        |         |           | x                          |                              |                  |                       |                          |            |               |                |               |               | x            |
| Jennings et al. (2017) TAMPA, FL                          |         |           |                            |                              |                  |                       |                          |            |               |                |               |               | x            |
| Katz et al. (2015, 2016) PHOENIX, AZ (Maryvale)           | x       |           | x                          |                              |                  |                       |                          | x          |               |                |               |               |              |

|                                                         |   |   |   |   |   |   |   |  |   |   |   |   |   |
|---------------------------------------------------------|---|---|---|---|---|---|---|--|---|---|---|---|---|
| Katz et al. (2019) PHOENIX, AZ (not Maryvale/Mandated)  | x |   | x | x |   | x |   |  | x |   |   |   | x |
| Katz et al. (2019) PHOENIX, AZ (not Maryvale/Volunteer) | x |   | x | x |   | x |   |  | x |   |   |   | x |
| Koslicki et al. (2019) NORTHWEST CITY                   |   |   |   |   |   |   |   |  |   |   |   |   | x |
| Mesa PD, Ready and Young (2013, 2015) MESA, AZ          | x | x |   |   |   | x |   |  |   | x |   |   |   |
| Mitchell et al. (2018) URUGUAY                          |   |   | x |   |   |   |   |  |   |   |   |   |   |
| Peterson, Lawrence, et al. (2018, 2019) MILWAUKEE, WI   | x |   | x |   |   | x |   |  |   | x |   | x | x |
| Sousa, Braga, et al. (2016, 2018) LAS VEGAS, NV         | x | x | x | x | x | x |   |  |   |   |   |   | x |
| Stolzenberg et al. (2019) MIAMI-DADE, FL                | x |   | x |   | x |   | x |  |   |   |   | x | x |
| Wallace et al. (2018) SPOKANE, WA                       | x |   |   |   |   | x |   |  | x |   | x |   |   |
| White et al. (2018) SPOKANE, WA                         |   |   | x |   |   |   | x |  |   |   |   |   | x |
| Yokum et al. (2019) WASHINGTON, DC                      | x |   | x |   |   |   | x |  |   |   |   | x | x |
